# Supplementary material for: A simple strategy for carboxylated MWNTs as a metal-free electrosensor for anchoring the RhB CN group
Source: Royal Society of Chemistry journal article supplement (doi:10.1039/c9ay00744j), 2019-01-01
Supplement: c9ay00744j1.pdf [file c9ay00744j1.pdf]

## Supporting information

### **A simple strategy for carboxylated MWNTs as metal-free electrosensor to anchoring C=N group on RhB**

Lifei Ji,<sup>b</sup> Xian Zhou,<sup>b</sup> Jian Zhang,<sup>b</sup> Xin Zhang,<sup>\*b</sup> Weidong Kang<sup>\*a</sup> and Fengchun Yang<sup>b</sup>

<sup>a</sup>.State Key Laboratory of Continental Dynamics, Department of Geology, Northwest University, Xi'an, 710069, China. E-mail: kwd1960@nwu.edu.cn (W. Kang)

<sup>b</sup>.Key Laboratory of Synthetic and Natural Functional Molecule Chemistry of Ministry of Education, National Demonstration Center for Experimental Chemistry Education, College of Chemistry & Material Science, Northwest University, Xi'an 710127, China. E-mail: zhangxin@nwu.edu.cn (X. Zhang).

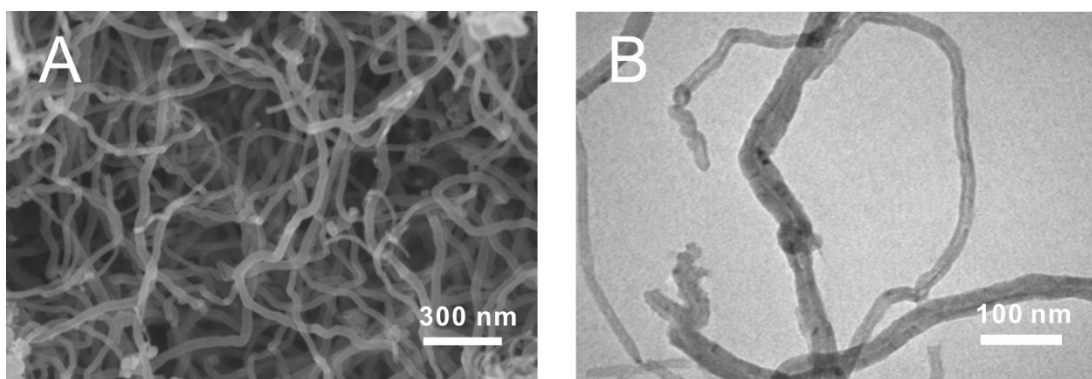

**Fig. S1** The SEM (A) and TEM (B) images of MWNTs-COOH.

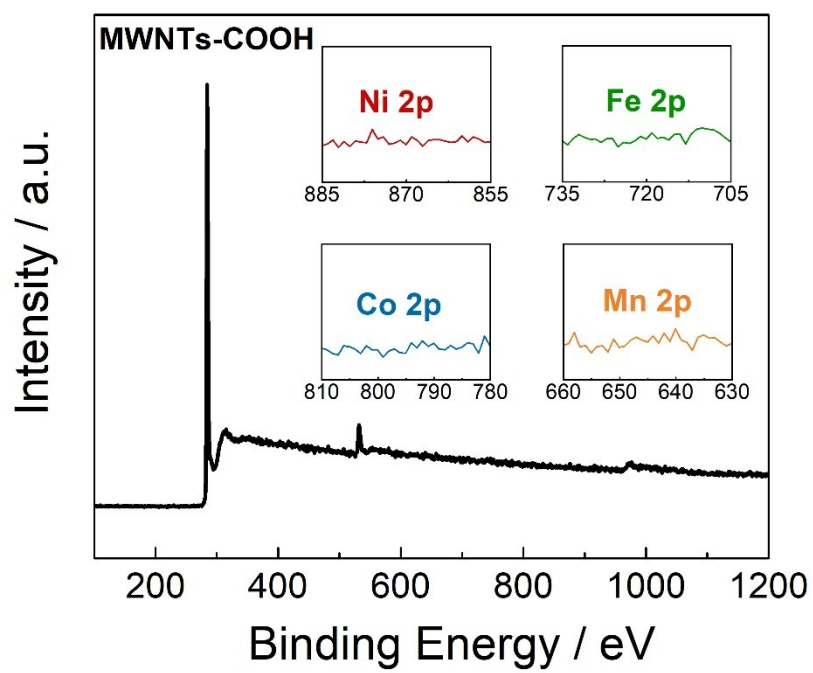

**Fig.S2.** The high resolution XPS survey spectrum of the MWNTs-COOH.

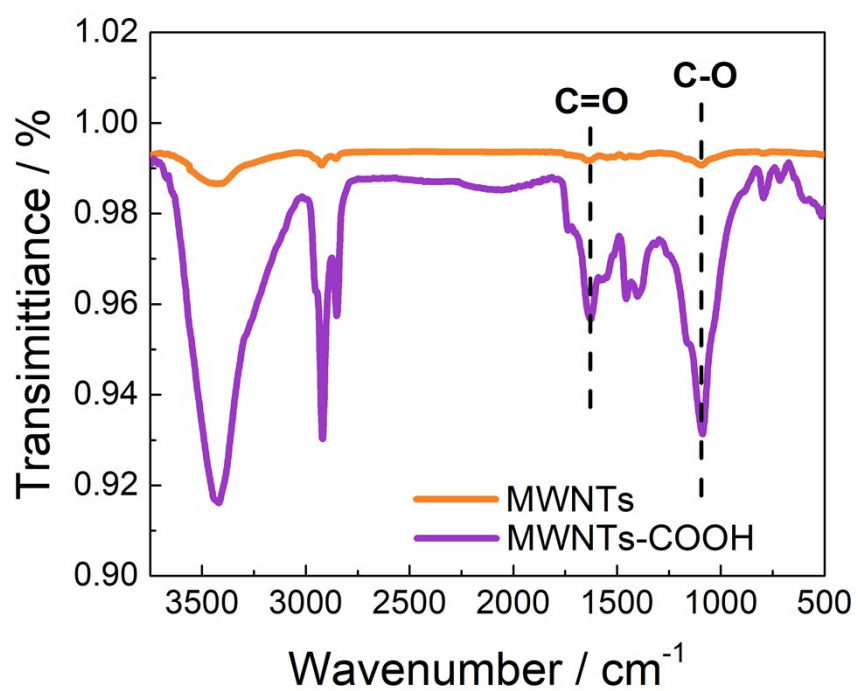

**Fig. S3.** FT-IR spectrums of MWNTs and MWNTs-COOH, and the image shows the characteristic absorption of C=O and C-O.

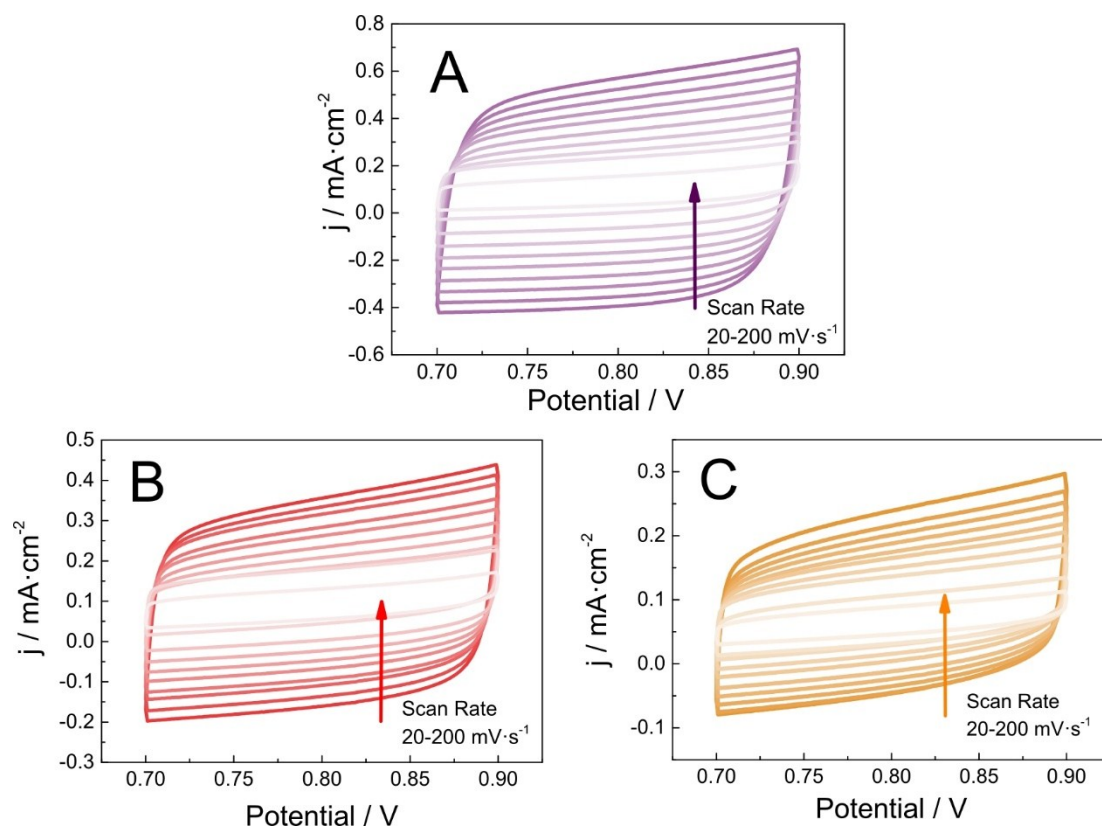

**Fig. S4.** Electrochemical surface area (ECSA) tests of MWNTs-COOH, o-MWNTs and raw MWNTs in 0.1 M PBS (pH= 5). Cyclic voltammetry curves of MWNTs-COOH (A), o-MWNTs (B) and raw MWNTs (C) with different scanning rates from 20 to 200  $\text{mV s}^{-1}$ .

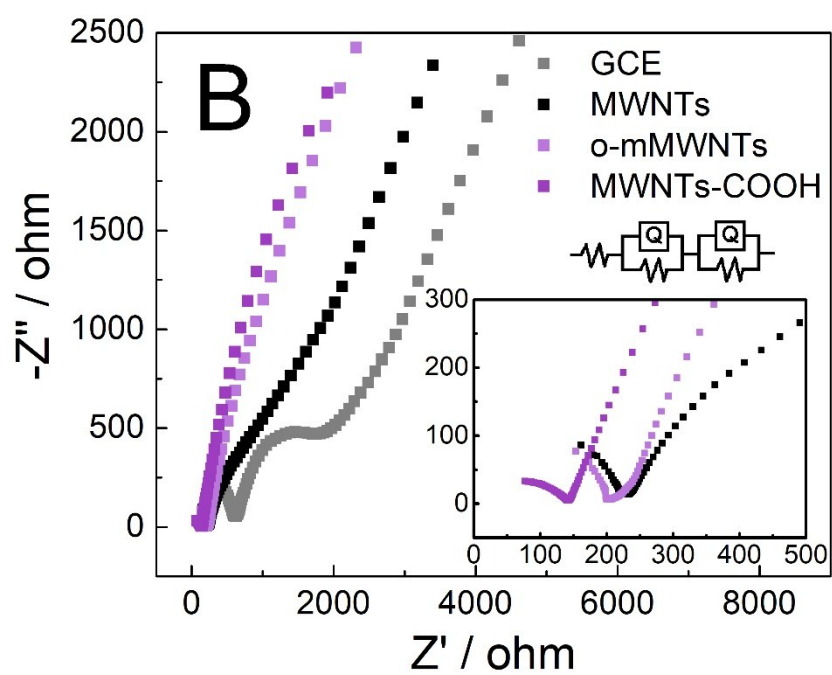

**Fig. S5.** EIS plots of bare GCE, MWNTs, o-MWNTs and MWNTs-COOH in 0.1 M KCl containing 1.0 mM  $[\text{Fe}(\text{CN})_6]^{4-/3-}$  with a frequency range from 0.1 to  $10^6$  Hz. The equivalent circuit was stimulated in the inset.

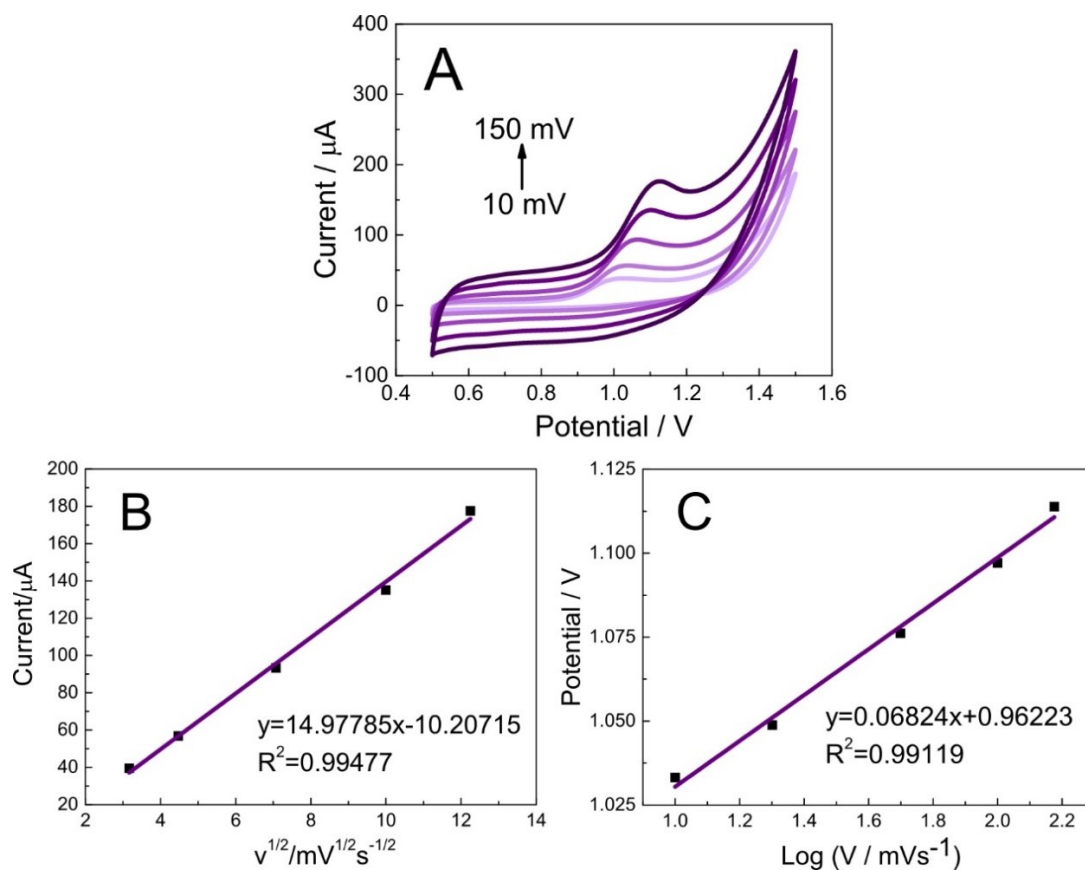

**Fig. S6.** (A) CVs of the MWNTs-COOH/GCE in 0.1 M PBS (pH=5) including 0.5mM RhB solution at different scan rates of 10, 20, 50, 100 and 150  $\text{mV s}^{-1}$ ; (B) The plots of peak current versus the square root of scan rate for RhB; (C) Plots of reduction peak potential vs.  $\log v$  for RhB.

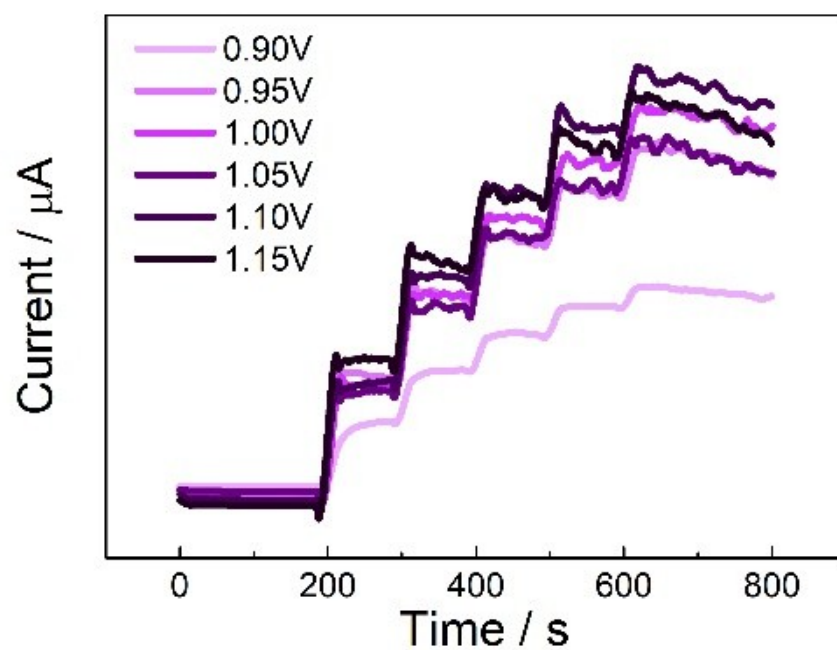

**Fig. S7.** Amperometric responses of MWNTs-COOH modified GCE for RhB at different potentials (0.90 to 1.15 V).

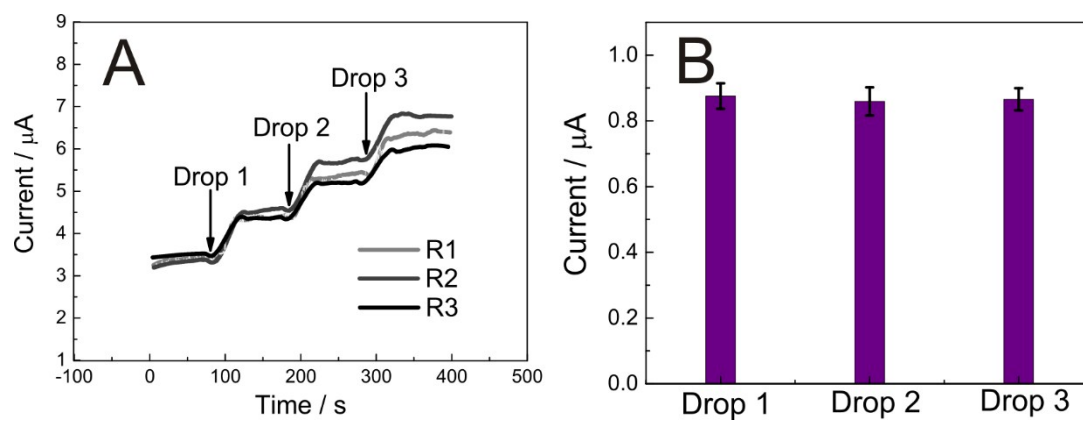

**Fig. S8.** (A) The reproducibility investigation of 3 amperometric experiments (R1–R3) with 3 successive dropwise addition of 5  $\mu\text{M}$  RhB; (B) The reproducibility investigation of 3 reduplicative experiments (Drop 1- Drop 3) for amperometric determination of RhB at the applied potential of 1.0V.

**Table S1.** ICP-AES detection of metal impurities in MWNTs.

| Materials  | Fe/ppm | Co/ppm | Ni/ppm | Mn/ppm |
|------------|--------|--------|--------|--------|
| MWNTs      | 0.868  | 0.015  | 0.250  | 0.044  |
| MWNTs-COOH | 0.135  | 0.008  | 0.074  | 0.001  |
